# Supplementary material for: Sulphur limitation and early sulphur deficiency responses in poplar: significance of gene expression, metabolites, and plant hormones
Source: PubMed Central journal article supplement — J Exp Bot. 2011 Dec 7;63(5):1873–93. doi: 10.1093/jxb/err365 (PMC3295385; doi:10.1093/jxb/err365), 2011-12-07
Supplement: supp_err365_00066969_file001.pdf [file supp_err365_00066969_file001.pdf]

## Supplementary Data

Supplementary Table S1 Sequences of oligonucleotide primer pairs used for cloning the gene sequences of *PtaATPS1/2*, *PtaATPS3/4*, *PtabTub* and *PtaANT*.

| Gene              | Primer orientation | Oligonucleotide sequence sequence (5' → 3') |
|-------------------|--------------------|---------------------------------------------|
| <i>PtaATPS1/2</i> | forward            | GATAAGTGAAGGATGGGCGA                        |
|                   | reverse            | CTATTAGCCGCCTCACCAAA                        |
| <i>PtaATPS3/4</i> | forward            | GTTGATCGACCCAGATGGTG                        |
|                   | reverse            | ACAGGTTCTGGGACTTTGCC                        |
| <i>PtabTub</i>    | forward            | GCCATTCTTTAGGAGGAGGG                        |
|                   | reverse            | GAGCTCTGGGACAGTCAAGG                        |
| <i>PtaANT</i>     | forward            | AGGCTTCTCTCTCACCCC                          |
|                   | reverse            | TAGGAGAGATCTGCCTCGGA                        |

**Supplementary Table S2** Oligonucleotide primer sequences used for qRT-PCR analysis and resulting PCR fragment lengths. If primer pairs were established by other authors, the corresponding reference is added. The primer sequences for *PtabTub* and *PtaANT* were taken from Gutierrez et al. (2008) and modified for *Populus tremula* x *P. alba* sequences. bp: base pairs.

| Gene        | Primer orientation | Oligonucleotide sequence (5' → 3') | Fragment length | Reference                                     |
|-------------|--------------------|------------------------------------|-----------------|-----------------------------------------------|
| PtaSULTR1;2 | forward            | CAGTTTCGATATCCTTTGCCAAGATTC        | 248 bp          |                                               |
|             | reverse            | GGTCTGGCCTGATTTGTTTACTAGCTC        |                 |                                               |
| PtaSULTR1;1 | forward            | TTTATAACCCGTGCAGATAAGGAC           | 113 bp          | Dürr et al., 2010 <sup>1</sup>                |
|             | reverse            | CCTTTTAGCAAATGGTCACCAC             |                 |                                               |
| PtaSULTR4;1 | forward            | GGCCTGCGTATATATGATATCTGTC          | 114 bp          | Dürr et al., 2010 <sup>1</sup>                |
|             | reverse            | AAACCTTACGACAAGTATTGCATTG          |                 |                                               |
| PtaSULTR4;2 | forward            | GAGGCAGGGCGTAGATTG                 | 132 bp          | Dürr et al., 2010 <sup>1</sup>                |
|             | reverse            | GGAAGCAAGCCTTACAATGC               |                 |                                               |
| PtaATPS1/2  | forward            | GGGTGGCAGCATATGATACTGTGG           | 197 bp          |                                               |
|             | reverse            | GCCTCTTCTGCCTGCAACCTC              |                 |                                               |
| PtaATPS3/4  | forward            | TGAGGAGGTGCTTAAGGATGGTGTCC         | 179 bp          |                                               |
|             | reverse            | CAACTGGATGGCTCATTCCAGCTG           |                 |                                               |
| PtaAPR      | forward            | AAGGAACCATGGCTTGTGGTGCTCT          | 138 bp          |                                               |
|             | reverse            | CTGATCGCCATCTGCCCTGAATTTT          |                 |                                               |
| PtaEflb     | forward            | TGAGGATCTCTGGTGTGCGAAG             | 100 bp          | Wildhagen et al., 2010 <sup>1</sup>           |
|             | reverse            | GTCTCAGCAGATGGAGGAGTG              |                 |                                               |
| PtabTub *   | forward            | GATGCTTACATTCTCCGTCTTTCCC          | 222 bp          | Gutierrez et al. 2008 <sup>2</sup> (modified) |
|             | reverse            | GTGACCCAGACATTGTAGCAGAAA           |                 |                                               |
| PtaANT *    | forward            | TCTGTCTGTTATGCCCTCA                | 120 bp          | Gutierrez et al. 2008 <sup>2</sup> (modified) |
|             | reverse            | CCACCTAGGAAGTCCTCCAGT              |                 |                                               |

<sup>1</sup> see references

<sup>2</sup> Gutierrez L, Mauriat M, Pelloux J, Bellini C, Van Wuytswinkel O. 2008. Towards a systematic validation of references in real-time RT-PCR. *Plant Cell* 20, 1734–1735.

**Supplementary Table S3** Contents of all analysed plant hormones in fine roots of poplar treated with sulphur depletion and of control plants (0 day). Data presented are means and standard deviations of 5 replicates where each replicate consisted of two pooled plants. Small letters indicate significant differences at  $p < 0.05$  between different time-points. dw: dry weight; n.d.: not detected

| Days of sulphur depletion                | 0d                   |       | 2d                  |      | 5d                  |       | 9d                  |       | 14d                 |       | 21d                 |       |
|------------------------------------------|----------------------|-------|---------------------|------|---------------------|-------|---------------------|-------|---------------------|-------|---------------------|-------|
| Plant hormone [pmol* g <sup>-1</sup> dw] | Mean                 | S.D.  | Mean                | S.D. | Mean                | S.D.  | Mean                | S.D.  | Mean                | S.D.  | Mean                | S.D.  |
| <b>tZ</b>                                | 1.87 <sup>a</sup>    | 0.96  | 2.11 <sup>a</sup>   | 0.47 | 1.68 <sup>a</sup>   | 0.56  | 2.37 <sup>a</sup>   | 0.40  | 1.61 <sup>a</sup>   | 0.38  | 2.70 <sup>a</sup>   | 1.02  |
| <b>tZR</b>                               | 2.64 <sup>a</sup>    | 0.98  | 3.58 <sup>ab</sup>  | 1.06 | 5.70 <sup>b</sup>   | 1.27  | 3.59 <sup>ab</sup>  | 1.08  | 3.43 <sup>a</sup>   | 0.92  | 3.88 <sup>ab</sup>  | 1.20  |
| <b>tZRP</b> s                            | 7.73 <sup>a</sup>    | 4.38  | 8.22 <sup>a</sup>   | 4.08 | 8.82 <sup>a</sup>   | 2.49  | 5.85 <sup>a</sup>   | 1.44  | 7.18 <sup>a</sup>   | 5.84  | 12.12 <sup>a</sup>  | 4.13  |
| <b>tZ7G</b>                              | n.d.                 | n.d.  | n.d.                | n.d. | n.d.                | n.d.  | n.d.                | n.d.  | n.d.                | n.d.  | 0.74                | 0.41  |
| <b>tZ9G</b>                              | n.d.                 | n.d.  | n.d.                | n.d. | n.d.                | n.d.  | n.d.                | n.d.  | n.d.                | n.d.  | n.d.                | n.d.  |
| <b>tZOG</b>                              | 78.83 <sup>ab</sup>  | 30.28 | 74.41 <sup>a</sup>  | 8.61 | 113.3 <sup>b</sup>  | 14.12 | 80.01 <sup>ab</sup> | 13.01 | 78.76 <sup>ab</sup> | 27.07 | 90.93 <sup>ab</sup> | 13.04 |
| <b>tZROG</b>                             | 3.69 <sup>a</sup>    | 2.37  | 3.22 <sup>a</sup>   | 0.61 | 2.39 <sup>a</sup>   | 0.15  | 3.03 <sup>a</sup>   | 1.60  | 2.43 <sup>a</sup>   | 1.02  | 4.35 <sup>a</sup>   | 1.38  |
| <b>tZRP</b> sOG                          | 0.33 <sup>a</sup>    | 0.19  | 0.09 <sup>b</sup>   | 0.01 | 0.21 <sup>ab</sup>  | 0.07  | 0.32 <sup>a</sup>   | 0.13  | 0.20 <sup>ab</sup>  | 0.09  | 0.39 <sup>a</sup>   | 0.06  |
| <b>cZ</b>                                | 8.94 <sup>ab</sup>   | 3.54  | 13.72 <sup>a</sup>  | 8.26 | 3.06 <sup>b</sup>   | 1.84  | 4.13 <sup>ab</sup>  | 1.26  | 6.10 <sup>ab</sup>  | 6.51  | 4.50 <sup>ab</sup>  | 1.16  |
| <b>cZR</b>                               | 3.93 <sup>a</sup>    | 1.52  | 5.65 <sup>a</sup>   | 0.96 | 5.68 <sup>a</sup>   | 1.19  | 4.29 <sup>a</sup>   | 0.74  | 4.03 <sup>a</sup>   | 1.13  | 3.91 <sup>a</sup>   | 1.24  |
| <b>cZRP</b> s                            | 13.45 <sup>abc</sup> | 1.73  | 15.17 <sup>bc</sup> | 2.67 | 19.77 <sup>c</sup>  | 7.00  | 11.00 <sup>ab</sup> | 1.87  | 9.53 <sup>a</sup>   | 1.91  | 9.21 <sup>a</sup>   | 0.90  |
| <b>cZOG</b>                              | 34.00 <sup>ab</sup>  | 7.50  | 26.10 <sup>a</sup>  | 5.90 | 30.15 <sup>ab</sup> | 4.75  | 32.54 <sup>ab</sup> | 5.58  | 30.57 <sup>ab</sup> | 4.82  | 40.27 <sup>b</sup>  | 4.57  |
| <b>cZROG</b>                             | 18.37 <sup>ab</sup>  | 4.91  | 14.82 <sup>a</sup>  | 4.15 | 20.73 <sup>ab</sup> | 2.88  | 20.65 <sup>ab</sup> | 7.24  | 16.87 <sup>a</sup>  | 4.08  | 27.39 <sup>b</sup>  | 3.54  |
| <b>cZRP</b> sOG                          | 1.24 <sup>a</sup>    | 0.46  | 0.48 <sup>b</sup>   | 0.12 | 1.66 <sup>a</sup>   | 0.52  | 1.57 <sup>a</sup>   | 0.54  | 1.55 <sup>a</sup>   | 1.10  | 2.55 <sup>a</sup>   | 0.65  |
| <b>iP</b>                                | 4.11 <sup>a</sup>    | 1.29  | 4.71 <sup>a</sup>   | 1.43 | 4.43 <sup>a</sup>   | 1.59  | 3.20 <sup>a</sup>   | 0.79  | 2.74 <sup>a</sup>   | 0.50  | 4.25 <sup>a</sup>   | 0.79  |
| <b>iPR</b>                               | 2.98 <sup>a</sup>    | 0.88  | 5.63 <sup>a</sup>   | 3.72 | 2.81 <sup>a</sup>   | 0.44  | 3.00 <sup>a</sup>   | 1.03  | 2.59 <sup>a</sup>   | 0.52  | 2.30 <sup>a</sup>   | 0.23  |
| <b>iPRP</b> s                            | 47.79 <sup>ab</sup>  | 9.00  | 34.52 <sup>a</sup>  | 8.85 | 57.79 <sup>b</sup>  | 18.66 | 38.48 <sup>ab</sup> | 7.29  | 28.71 <sup>a</sup>  | 4.75  | 46.91 <sup>ab</sup> | 5.78  |
| <b>iP7G</b>                              | 6.51 <sup>ab</sup>   | 2.45  | 11.18 <sup>b</sup>  | 7.86 | 3.75 <sup>ac</sup>  | 1.42  | 3.96 <sup>abc</sup> | 0.77  | 3.21 <sup>ac</sup>  | 1.37  | 2.55 <sup>c</sup>   | 0.71  |
| <b>iP9G</b>                              | 0.23 <sup>a</sup>    | 0.06  | 0.18 <sup>a</sup>   | 0.07 | 0.28 <sup>a</sup>   | 0.13  | 0.18 <sup>a</sup>   | 0.06  | 0.16 <sup>a</sup>   | 0.05  | 0.31 <sup>a</sup>   | 0.04  |
| <b>DZ</b>                                | n.d.                 | n.d.  | n.d.                | n.d. | n.d.                | n.d.  | n.d.                | n.d.  | n.d.                | n.d.  | n.d.                | n.d.  |
| <b>DZR</b>                               | n.d.                 | n.d.  | n.d.                | n.d. | n.d.                | n.d.  | 0.11 <sup>a</sup>   | 0.05  | 0.06 <sup>a</sup>   | 0.02  | 0.28 <sup>a</sup>   | 0.15  |
| <b>DZRP</b> s                            | 0.33 <sup>ab</sup>   | 0.16  | 0.26 <sup>a</sup>   | 0.07 | 0.44 <sup>ab</sup>  | 0.14  | 0.49 <sup>ab</sup>  | 0.17  | 0.51 <sup>a</sup>   | 0.70  | 2.78 <sup>b</sup>   | 1.33  |

|               |                     |       |                    |       |                     |       |                     |       |                     |       |                     |       |
|---------------|---------------------|-------|--------------------|-------|---------------------|-------|---------------------|-------|---------------------|-------|---------------------|-------|
| <b>DZ9G</b>   | n.d.                | n.d.  | n.d.               | n.d.  | n.d.                | n.d.  | n.d.                | n.d.  | n.d.                | n.d.  | n.d.                | n.d.  |
| <b>IAA</b>    | 733.5 <sup>a</sup>  | 210.8 | 806.2 <sup>a</sup> | 171.2 | 1059 <sup>a</sup>   | 431.0 | 989.8 <sup>a</sup>  | 380.2 | 785.7 <sup>a</sup>  | 154.5 | 767.8 <sup>a</sup>  | 205.2 |
| <b>IAA1a</b>  | n.d.                | n.d.  | n.d.               | n.d.  | n.d.                | n.d.  | n.d.                | n.d.  | n.d.                | n.d.  | n.d.                | n.d.  |
| <b>IA1le</b>  | n.d.                | n.d.  | n.d.               | n.d.  | n.d.                | n.d.  | n.d.                | n.d.  | n.d.                | n.d.  | n.d.                | n.d.  |
| <b>IA1leu</b> | n.d.                | n.d.  | n.d.               | n.d.  | n.d.                | n.d.  | n.d.                | n.d.  | n.d.                | n.d.  | n.d.                | n.d.  |
| <b>IAAsp</b>  | 394.6 <sup>a</sup>  | 169.4 | n.d.               | n.d.  | 1554 <sup>a</sup>   | 2080  | 733.4 <sup>a</sup>  | 386.1 | 332.5 <sup>a</sup>  | 166.5 | 1059 <sup>a</sup>   | 1090  |
| <b>IA1Trp</b> | n.d.                | n.d.  | n.d.               | n.d.  | n.d.                | n.d.  | n.d.                | n.d.  | n.d.                | n.d.  | n.d.                | n.d.  |
| <b>IA1Phe</b> | n.d.                | n.d.  | n.d.               | n.d.  | n.d.                | n.d.  | n.d.                | n.d.  | n.d.                | n.d.  | n.d.                | n.d.  |
| <b>GA1</b>    | n.d.                | n.d.  | n.d.               | n.d.  | n.d.                | n.d.  | n.d.                | n.d.  | n.d.                | n.d.  | n.d.                | n.d.  |
| <b>GA3</b>    | n.d.                | n.d.  | n.d.               | n.d.  | n.d.                | n.d.  | n.d.                | n.d.  | n.d.                | n.d.  | n.d.                | n.d.  |
| <b>GA4</b>    | n.d.                | n.d.  | n.d.               | n.d.  | n.d.                | n.d.  | n.d.                | n.d.  | n.d.                | n.d.  | n.d.                | n.d.  |
| <b>GA7</b>    | n.d.                | n.d.  | n.d.               | n.d.  | n.d.                | n.d.  | n.d.                | n.d.  | n.d.                | n.d.  | n.d.                | n.d.  |
| <b>GA8</b>    | 28.29 <sup>ab</sup> | 10.64 | 20.89 <sup>a</sup> | 6.22  | 35.05 <sup>ab</sup> | 12.29 | n.d.                | n.d.  | n.d.                | n.d.  | 50.26 <sup>b</sup>  | 4.77  |
| <b>GA9</b>    | n.d.                | n.d.  | n.d.               | n.d.  | n.d.                | n.d.  | n.d.                | n.d.  | n.d.                | n.d.  | n.d.                | n.d.  |
| <b>GA12</b>   | n.d.                | n.d.  | n.d.               | n.d.  | n.d.                | n.d.  | n.d.                | n.d.  | n.d.                | n.d.  | n.d.                | n.d.  |
| <b>GA19</b>   | n.d.                | n.d.  | n.d.               | n.d.  | n.d.                | n.d.  | n.d.                | n.d.  | n.d.                | n.d.  | n.d.                | n.d.  |
| <b>GA20</b>   | n.d.                | n.d.  | n.d.               | n.d.  | n.d.                | n.d.  | n.d.                | n.d.  | n.d.                | n.d.  | n.d.                | n.d.  |
| <b>GA24</b>   | n.d.                | n.d.  | n.d.               | n.d.  | n.d.                | n.d.  | n.d.                | n.d.  | n.d.                | n.d.  | n.d.                | n.d.  |
| <b>GA44</b>   | n.d.                | n.d.  | n.d.               | n.d.  | n.d.                | n.d.  | n.d.                | n.d.  | n.d.                | n.d.  | n.d.                | n.d.  |
| <b>GA53</b>   | n.d.                | n.d.  | n.d.               | n.d.  | n.d.                | n.d.  | n.d.                | n.d.  | n.d.                | n.d.  | n.d.                | n.d.  |
| <b>ABA</b>    | 271.6 <sup>a</sup>  | 44.61 | 125.1 <sup>b</sup> | 40.61 | 157.5 <sup>ab</sup> | 37.47 | 164.7 <sup>ab</sup> | 27.31 | 259.9 <sup>ab</sup> | 133.9 | 247.6 <sup>ab</sup> | 40.26 |

**Supplementary Table S4** Contents of all analysed plant hormones in young leaves of poplar treated with sulphur depletion and of control plants (0 day). Data presented are means and standard deviations of 5 replicates where each replicate consisted of two pooled plants. Small letters indicate significant differences at  $p < 0.05$  between different time-points. dw: dry weight; n.d.: not detected

| Days of sulphur depletion<br>Plant hormone [pmol* g <sup>-1</sup> dw] | 0d                  |       | 2d                  |       | 5d                 |      | 9d                  |       | 14d                 |      | 21d                 |       |
|-----------------------------------------------------------------------|---------------------|-------|---------------------|-------|--------------------|------|---------------------|-------|---------------------|------|---------------------|-------|
|                                                                       | Mean                | S.D.  | Mean                | S.D.  | Mean               | S.D. | Mean                | S.D.  | Mean                | S.D. | Mean                | S.D.  |
| <b>tZ</b>                                                             | 4.15 <sup>a</sup>   | 0.49  | 5.08 <sup>ab</sup>  | 1.52  | 6.10 <sup>b</sup>  | 0.73 | 4.13 <sup>a</sup>   | 0.51  | 3.60 <sup>a</sup>   | 0.30 | 9.52 <sup>c</sup>   | 2.63  |
| <b>tZR</b>                                                            | 1.63 <sup>a</sup>   | 0.89  | 2.99 <sup>bc</sup>  | 1.23  | 4.94 <sup>c</sup>  | 1.20 | 1.97 <sup>ab</sup>  | 0.74  | 1.99 <sup>ab</sup>  | 0.26 | 2.93 <sup>b</sup>   | 0.95  |
| <b>tZRP</b> s                                                         | 7.36 <sup>a</sup>   | 0.75  | 12.44 <sup>ab</sup> | 6.25  | 22.73 <sup>b</sup> | 6.76 | 7.74 <sup>ab</sup>  | 1.24  | 6.53 <sup>a</sup>   | 0.98 | 10.69 <sup>ab</sup> | 3.75  |
| <b>tZ7G</b>                                                           | n.d.                | n.d.  | n.d.                | n.d.  | n.d.               | n.d. | n.d.                | n.d.  | n.d.                | n.d. | n.d.                | n.d.  |
| <b>tZ9G</b>                                                           | n.d.                | n.d.  | n.d.                | n.d.  | n.d.               | n.d. | n.d.                | n.d.  | n.d.                | n.d. | n.d.                | n.d.  |
| <b>tZOG</b>                                                           | 67.95 <sup>a</sup>  | 10.20 | 72.92 <sup>a</sup>  | 11.13 | 70.06 <sup>a</sup> | 7.35 | 68.98 <sup>a</sup>  | 18.10 | 69.70 <sup>a</sup>  | 4.64 | 62.04 <sup>a</sup>  | 26.16 |
| <b>tZROG</b>                                                          | 1.31 <sup>a</sup>   | 0.29  | 2.52 <sup>b</sup>   | 1.01  | 2.01 <sup>ab</sup> | 0.49 | 1.39 <sup>a</sup>   | 0.22  | 1.34 <sup>a</sup>   | 0.09 | 1.95 <sup>ab</sup>  | 0.53  |
| <b>tZRPsOG</b>                                                        | n.d.                | n.d.  | n.d.                | n.d.  | n.d.               | n.d. | n.d.                | n.d.  | n.d.                | n.d. | n.d.                | n.d.  |
| <b>cZ</b>                                                             | 9.72 <sup>ab</sup>  | 2.91  | 18.39 <sup>bc</sup> | 8.12  | 7.65 <sup>a</sup>  | 1.41 | 10.78 <sup>ab</sup> | 3.99  | 9.63 <sup>ab</sup>  | 3.37 | 23.40 <sup>c</sup>  | 7.18  |
| <b>cZR</b>                                                            | 3.42 <sup>a</sup>   | 0.83  | 4.91 <sup>a</sup>   | 2.08  | 3.94 <sup>a</sup>  | 0.43 | 4.27 <sup>a</sup>   | 0.89  | 4.83 <sup>a</sup>   | 1.14 | 3.57 <sup>a</sup>   | 0.52  |
| <b>cZRP</b> s                                                         | 13.69 <sup>a</sup>  | 2.39  | 12.91 <sup>a</sup>  | 2.97  | 17.80 <sup>a</sup> | 2.52 | 12.83 <sup>a</sup>  | 3.69  | 13.84 <sup>a</sup>  | 3.49 | 15.78 <sup>a</sup>  | 5.00  |
| <b>cZOG</b>                                                           | 23.54 <sup>a</sup>  | 2.75  | 23.70 <sup>a</sup>  | 2.69  | 21.54 <sup>a</sup> | 0.95 | 26.08 <sup>a</sup>  | 2.68  | 24.13 <sup>a</sup>  | 1.59 | 85.63 <sup>a</sup>  | 162.3 |
| <b>cZROG</b>                                                          | 6.35 <sup>a</sup>   | 0.26  | 6.77 <sup>a</sup>   | 0.72  | 8.24 <sup>b</sup>  | 0.27 | 7.46 <sup>ab</sup>  | 0.66  | 7.15 <sup>ab</sup>  | 1.05 | 7.09 <sup>ab</sup>  | 0.40  |
| <b>cZRPsOG</b>                                                        | 0.59 <sup>ad</sup>  | 0.24  | 0.30 <sup>ac</sup>  | 0.11  | 1.43 <sup>b</sup>  | 0.58 | 0.30 <sup>ac</sup>  | 0.10  | 0.26 <sup>c</sup>   | 0.08 | 0.71 <sup>bd</sup>  | 0.23  |
| <b>iP</b>                                                             | 35.84 <sup>a</sup>  | 5.30  | 38.62 <sup>a</sup>  | 4.04  | 39.08 <sup>a</sup> | 5.72 | 38.49 <sup>a</sup>  | 2.58  | 42.27 <sup>a</sup>  | 6.24 | n.d.                | n.d.  |
| <b>iPR</b>                                                            | 35.70 <sup>a</sup>  | 4.87  | 37.88 <sup>a</sup>  | 3.98  | 39.88 <sup>a</sup> | 7.89 | 37.46 <sup>a</sup>  | 3.22  | 42.19 <sup>a</sup>  | 7.59 | 42.75 <sup>a</sup>  | 4.48  |
| <b>iPRP</b> s                                                         | 17.83 <sup>ab</sup> | 2.07  | 17.24 <sup>a</sup>  | 3.32  | 22.90 <sup>b</sup> | 4.25 | 18.02 <sup>ab</sup> | 3.36  | 15.38 <sup>a</sup>  | 1.23 | 16.47 <sup>a</sup>  | 1.99  |
| <b>iP7G</b>                                                           | n.d.                | n.d.  | n.d.                | n.d.  | n.d.               | n.d. | n.d.                | n.d.  | n.d.                | n.d. | n.d.                | n.d.  |
| <b>iP9G</b>                                                           | n.d.                | n.d.  | n.d.                | n.d.  | n.d.               | n.d. | n.d.                | n.d.  | n.d.                | n.d. | n.d.                | n.d.  |
| <b>DZ</b>                                                             | n.d.                | n.d.  | n.d.                | n.d.  | n.d.               | n.d. | n.d.                | n.d.  | n.d.                | n.d. | n.d.                | n.d.  |
| <b>DZR</b>                                                            | 0.50 <sup>a</sup>   | 0.22  | 1.11 <sup>abc</sup> | 0.34  | 1.47 <sup>bc</sup> | 0.35 | 0.82 <sup>ab</sup>  | 0.39  | 1.01 <sup>abc</sup> | 0.31 | 1.64 <sup>c</sup>   | 0.46  |
| <b>DZRP</b> s                                                         | 3.35 <sup>a</sup>   | 0.24  | 5.10 <sup>ab</sup>  | 1.07  | 7.09 <sup>b</sup>  | 2.33 | 3.96 <sup>ab</sup>  | 1.77  | 3.54 <sup>ab</sup>  | 0.65 | 5.28 <sup>ab</sup>  | 0.87  |

|               |                     |       |                     |       |                    |       |                     |       |                     |       |                     |       |
|---------------|---------------------|-------|---------------------|-------|--------------------|-------|---------------------|-------|---------------------|-------|---------------------|-------|
| <b>DZ9G</b>   | 2.86 <sup>a</sup>   | 0.21  | 4.84 <sup>b</sup>   | 1.72  | 4.25 <sup>ab</sup> | 0.84  | 3.33 <sup>ab</sup>  | 0.51  | 3.09 <sup>ab</sup>  | 0.24  | 5.22 <sup>b</sup>   | 0.61  |
| <b>IAA</b>    | 1336 <sup>ac</sup>  | 89.33 | 1553 <sup>ac</sup>  | 255.9 | 2374 <sup>b</sup>  | 363.9 | 1417 <sup>c</sup>   | 166.8 | 993.8 <sup>d</sup>  | 180.0 | 926.6 <sup>d</sup>  | 120.4 |
| <b>IAA1a</b>  | n.d.                | n.d.  | n.d.                | n.d.  | n.d.               | n.d.  | n.d.                | n.d.  | n.d.                | n.d.  | n.d.                | n.d.  |
| <b>IA1le</b>  | n.d.                | n.d.  | n.d.                | n.d.  | n.d.               | n.d.  | n.d.                | n.d.  | n.d.                | n.d.  | n.d.                | n.d.  |
| <b>IA1leu</b> | n.d.                | n.d.  | n.d.                | n.d.  | n.d.               | n.d.  | n.d.                | n.d.  | n.d.                | n.d.  | n.d.                | n.d.  |
| <b>IAAsp</b>  | 1061 <sup>a</sup>   | 454.2 | 1295 <sup>a</sup>   | 377.4 | 1333 <sup>a</sup>  | 208.0 | 737.7 <sup>a</sup>  | 356.5 | 1531 <sup>a</sup>   | 742.4 | n.d.                | n.d.  |
| <b>IA1Trp</b> | n.d.                | n.d.  | n.d.                | n.d.  | n.d.               | n.d.  | n.d.                | n.d.  | n.d.                | n.d.  | n.d.                | n.d.  |
| <b>IA1Phe</b> | n.d.                | n.d.  | n.d.                | n.d.  | n.d.               | n.d.  | n.d.                | n.d.  | n.d.                | n.d.  | n.d.                | n.d.  |
| <b>GA1</b>    | 20.11 <sup>ab</sup> | 3.15  | 20.01 <sup>ab</sup> | 6.04  | 21.91 <sup>a</sup> | 3.63  | 15.28 <sup>ab</sup> | 4.80  | 20.39 <sup>ab</sup> | 4.85  | 12.06 <sup>b</sup>  | 3.26  |
| <b>GA3</b>    | n.d.                | n.d.  | n.d.                | n.d.  | n.d.               | n.d.  | n.d.                | n.d.  | n.d.                | n.d.  | n.d.                | n.d.  |
| <b>GA4</b>    | 75.90 <sup>a</sup>  | 9.38  | 89.59 <sup>a</sup>  | 40.87 | 60.89 <sup>a</sup> | 1.46  | 72.72 <sup>a</sup>  | 26.84 | n.d.                | n.d.  | n.d.                | n.d.  |
| <b>GA7</b>    | n.d.                | n.d.  | n.d.                | n.d.  | n.d.               | n.d.  | n.d.                | n.d.  | n.d.                | n.d.  | n.d.                | n.d.  |
| <b>GA8</b>    | 244.6 <sup>a</sup>  | 47.31 | 181.1 <sup>a</sup>  | 49.51 | 197.2 <sup>a</sup> | 20.97 | 211.6 <sup>a</sup>  | 61.55 | 173.9 <sup>a</sup>  | 58.26 | 185.9 <sup>a</sup>  | 58.63 |
| <b>GA9</b>    | n.d.                | n.d.  | n.d.                | n.d.  | n.d.               | n.d.  | n.d.                | n.d.  | n.d.                | n.d.  | n.d.                | n.d.  |
| <b>GA12</b>   | n.d.                | n.d.  | n.d.                | n.d.  | n.d.               | n.d.  | n.d.                | n.d.  | n.d.                | n.d.  | n.d.                | n.d.  |
| <b>GA19</b>   | 213.8 <sup>a</sup>  | 16.63 | 159.6 <sup>ab</sup> | 37.07 | 144.4 <sup>b</sup> | 26.96 | 223.0 <sup>a</sup>  | 49.67 | 125.6 <sup>b</sup>  | 15.79 | 171.2 <sup>ab</sup> | 43.67 |
| <b>GA20</b>   | 70.83 <sup>a</sup>  | 27.48 | 89.49 <sup>a</sup>  | 21.08 | 90.65 <sup>a</sup> | 22.64 | 59.09 <sup>a</sup>  | 5.94  | 50.64 <sup>a</sup>  | 3.07  | n.d.                | n.d.  |
| <b>GA24</b>   | n.d.                | n.d.  | n.d.                | n.d.  | n.d.               | n.d.  | n.d.                | n.d.  | n.d.                | n.d.  | n.d.                | n.d.  |
| <b>GA44</b>   | n.d.                | n.d.  | n.d.                | n.d.  | n.d.               | n.d.  | n.d.                | n.d.  | n.d.                | n.d.  | n.d.                | n.d.  |
| <b>GA53</b>   | 46.90 <sup>a</sup>  | 2.90  | 29.01 <sup>a</sup>  | 6.53  | 45.62 <sup>a</sup> | 19.66 | 43.54 <sup>a</sup>  | 11.35 | 36.58 <sup>a</sup>  | 15.98 | 32.72 <sup>a</sup>  | 11.46 |
| <b>ABA</b>    | 23990 <sup>a</sup>  | 2693  | 16735 <sup>ab</sup> | 4606  | 21519 <sup>b</sup> | 4324  | 18809 <sup>ab</sup> | 4460  | 12627 <sup>b</sup>  | 3772  | 13039 <sup>b</sup>  | 2108  |



|              |                    |       |                     |       |                     |       |                     |       |                     |       |                    |       |
|--------------|--------------------|-------|---------------------|-------|---------------------|-------|---------------------|-------|---------------------|-------|--------------------|-------|
| <b>DZ9G</b>  | 3.20 <sup>a</sup>  | 0.47  | 4.62 <sup>ab</sup>  | 1.50  | 5.15 <sup>b</sup>   | 1.32  | 3.24 <sup>a</sup>   | 0.85  | 4.38 <sup>ab</sup>  | 0.51  | 6.16 <sup>b</sup>  | 0.62  |
| <b>IAA</b>   | 716.7 <sup>b</sup> | 397.2 | 500.1 <sup>b</sup>  | 142.9 | 397.2 <sup>a</sup>  | 134.5 | 445.8 <sup>a</sup>  | 104.2 | n.d.                | n.d.  | 368.3 <sup>a</sup> | 86.17 |
| <b>IAAla</b> | n.d.               | n.d.  | n.d.                | n.d.  | n.d.                | n.d.  | n.d.                | n.d.  | n.d.                | n.d.  | n.d.               | n.d.  |
| <b>IAIle</b> | n.d.               | n.d.  | n.d.                | n.d.  | n.d.                | n.d.  | n.d.                | n.d.  | 388.5               | 95.38 | n.d.               | n.d.  |
| <b>IALeu</b> | n.d.               | n.d.  | n.d.                | n.d.  | n.d.                | n.d.  | n.d.                | n.d.  | n.d.                | n.d.  | n.d.               | n.d.  |
| <b>IAAsp</b> | n.d.               | n.d.  | n.d.                | n.d.  | n.d.                | n.d.  | 614.0 <sup>a</sup>  | 231.1 | 1858 <sup>a</sup>   | 979.4 | 1414 <sup>a</sup>  | 1357  |
| <b>IATrp</b> | n.d.               | n.d.  | n.d.                | n.d.  | n.d.                | n.d.  | n.d.                | n.d.  | n.d.                | n.d.  | n.d.               | n.d.  |
| <b>IAPhe</b> | n.d.               | n.d.  | n.d.                | n.d.  | n.d.                | n.d.  | n.d.                | n.d.  | n.d.                | n.d.  | n.d.               | n.d.  |
| <b>GA1</b>   | 13.89 <sup>a</sup> | 5.94  | 8.93 <sup>a</sup>   | 3.89  | 8.95 <sup>a</sup>   | 5.36  | 4.47 <sup>a</sup>   | 1.63  | 6.86 <sup>a</sup>   | 2.07  | n.d.               | n.d.  |
| <b>GA3</b>   | n.d.               | n.d.  | n.d.                | n.d.  | n.d.                | n.d.  | n.d.                | n.d.  | n.d.                | n.d.  | n.d.               | n.d.  |
| <b>GA4</b>   | 45.01 <sup>a</sup> | 21.73 | 74.05 <sup>a</sup>  | 19.28 | 66.63 <sup>a</sup>  | 1.92  | 99.71 <sup>a</sup>  | 53.21 | n.d.                | n.d.  | 30.33 <sup>a</sup> | 19.02 |
| <b>GA7</b>   | n.d.               | n.d.  | n.d.                | n.d.  | n.d.                | n.d.  | n.d.                | n.d.  | n.d.                | n.d.  | n.d.               | n.d.  |
| <b>GA8</b>   | 98.79 <sup>a</sup> | 25.50 | 86.20 <sup>ab</sup> | 27.60 | 84.24 <sup>ab</sup> | 26.63 | 95.46 <sup>ab</sup> | 51.74 | 50.77 <sup>ab</sup> | 8.29  | 48.81 <sup>b</sup> | 14.64 |
| <b>GA9</b>   | n.d.               | n.d.  | n.d.                | n.d.  | n.d.                | n.d.  | n.d.                | n.d.  | n.d.                | n.d.  | n.d.               | n.d.  |
| <b>GA12</b>  | n.d.               | n.d.  | n.d.                | n.d.  | n.d.                | n.d.  | n.d.                | n.d.  | 1676 <sup>a</sup>   | 593.8 | 1943 <sup>a</sup>  | 918.0 |
| <b>GA19</b>  | 43.88 <sup>a</sup> | 10.57 | 35.37 <sup>a</sup>  | 13.76 | 37.05 <sup>a</sup>  | 11.72 | 31.56 <sup>a</sup>  | 13.70 | 25.61 <sup>a</sup>  | 4.52  | 26.83 <sup>a</sup> | 10.87 |
| <b>GA20</b>  | n.d.               | n.d.  | n.d.                | n.d.  | n.d.                | n.d.  | n.d.                | n.d.  | n.d.                | n.d.  | n.d.               | n.d.  |
| <b>GA24</b>  | n.d.               | n.d.  | n.d.                | n.d.  | n.d.                | n.d.  | n.d.                | n.d.  | n.d.                | n.d.  | n.d.               | n.d.  |
| <b>GA44</b>  | n.d.               | n.d.  | n.d.                | n.d.  | n.d.                | n.d.  | n.d.                | n.d.  | n.d.                | n.d.  | n.d.               | n.d.  |
| <b>GA53</b>  | 36.91 <sup>a</sup> | 5.23  | 20.10 <sup>b</sup>  | 8.88  | 17.22 <sup>b</sup>  | 5.10  | 26.67 <sup>ab</sup> | 5.51  | 18.03 <sup>b</sup>  | 7.12  | 15.00 <sup>b</sup> | 6.85  |
| <b>ABA</b>   | 7945 <sup>a</sup>  | 1275  | 7344 <sup>a</sup>   | 2133  | 4731 <sup>ab</sup>  | 1870  | 5759 <sup>ab</sup>  | 2128  | 4982 <sup>ab</sup>  | 1032  | 3839 <sup>b</sup>  | 1096  |





|              |                    |       |                    |       |                    |       |                    |       |                    |       |                    |       |
|--------------|--------------------|-------|--------------------|-------|--------------------|-------|--------------------|-------|--------------------|-------|--------------------|-------|
| <b>DZRPs</b> | 2.12 <sup>a</sup>  | 0.65  | 1.46 <sup>a</sup>  | 0.38  | 2.65 <sup>a</sup>  | 1.83  | 2.92 <sup>a</sup>  | 0.97  | 2.19 <sup>a</sup>  | 0.62  | 2.26 <sup>a</sup>  | 0.28  |
| <b>DZ9G</b>  | n.d.               | n.d.  |
| <b>IAA</b>   | 197.1 <sup>a</sup> | 111.3 | 148.4 <sup>a</sup> | 78.76 | 1061 <sup>a</sup>  | 1130  | 280.7 <sup>a</sup> | 60.42 | 190.3 <sup>a</sup> | 74.20 | 390.7 <sup>a</sup> | 134.2 |
| <b>IAAla</b> | n.d.               | n.d.  |
| <b>IAIle</b> | n.d.               | n.d.  |
| <b>IALeu</b> | n.d.               | n.d.  |
| <b>IAAsp</b> | n.d.               | n.d.  |
| <b>IATrp</b> | n.d.               | n.d.  |
| <b>IAPhe</b> | n.d.               | n.d.  |
| <b>GA1</b>   | n.d.               | n.d.  |
| <b>GA3</b>   | n.d.               | n.d.  |
| <b>GA4</b>   | n.d.               | n.d.  |
| <b>GA7</b>   | n.d.               | n.d.  |
| <b>GA8</b>   | 29.44 <sup>a</sup> | 7.27  | n.d.               | n.d.  |
| <b>GA9</b>   | 1024 <sup>a</sup>  | 1036  | 412.8 <sup>a</sup> | 61.83 | 4135 <sup>a</sup>  | 6761  | 3299 <sup>a</sup>  | 5675  | 523.8 <sup>a</sup> | 183.7 | 933.2 <sup>a</sup> | 1188  |
| <b>GA12</b>  | 2399               | 345.7 | n.d.               | n.d.  |
| <b>GA19</b>  | 32.13 <sup>a</sup> | 20.34 | 15.12 <sup>a</sup> | 4.52  | 53.83 <sup>a</sup> | 27.66 | 20.93 <sup>a</sup> | 13.71 | 20.88 <sup>a</sup> | 5.58  | 36.54 <sup>a</sup> | 22.77 |
| <b>GA20</b>  | n.d.               | n.d.  |
| <b>GA24</b>  | n.d.               | n.d.  |
| <b>GA44</b>  | n.d.               | n.d.  |
| <b>GA53</b>  | 199.8 <sup>a</sup> | 162.3 | 167.6 <sup>a</sup> | 106.7 | 731.2 <sup>a</sup> | 383.8 | 136.5 <sup>a</sup> | 26.79 | 253.4 <sup>a</sup> | 99.07 | 292.2 <sup>a</sup> | 255.0 |
| <b>ABA</b>   | 36401 <sup>a</sup> | 15698 | 23839 <sup>a</sup> | 4281  | 40624 <sup>a</sup> | 17559 | 26088 <sup>a</sup> | 9982  | 38805 <sup>a</sup> | 18050 | 45814 <sup>a</sup> | 25212 |

**Supplementary Table S7** Contents of all analysed plant hormones in phloem exudates of poplars treated with sulphur depletion and of control plants (0 day). Data presented are means and standard deviations of 5 replicates where each replicate consisted of two pooled plants. Small letters indicate significant differences at  $p < 0.05$  between different time-points. fw: fresh weight n.d.: not detected

| Days of sulphur depletion<br>Plant hormone [pmol* g <sup>-1</sup><br>bark fw] | 0d                 |      | 2d                  |       | 5d                  |       | 9d                 |      | 14d                 |      | 21d                 |       |
|-------------------------------------------------------------------------------|--------------------|------|---------------------|-------|---------------------|-------|--------------------|------|---------------------|------|---------------------|-------|
|                                                                               | Mean               | S.D. | Mean                | S.D.  | Mean                | S.D.  | Mean               | S.D. | Mean                | S.D. | Mean                | S.D.  |
| <b>tZ</b>                                                                     | 1.27 <sup>a</sup>  | 0.14 | 0.68 <sup>b</sup>   | 0.35  | 0.77 <sup>b</sup>   | 0.24  | 0.42 <sup>b</sup>  | 0.14 | 0.87 <sup>ab</sup>  | 0.10 | 0.84 <sup>ab</sup>  | 0.37  |
| <b>tZR</b>                                                                    | 3.51 <sup>a</sup>  | 0.65 | 3.58 <sup>a</sup>   | 1.56  | 4.28 <sup>a</sup>   | 2.37  | 0.83 <sup>a</sup>  | 0.26 | 3.00 <sup>a</sup>   | 1.23 | 2.67 <sup>a</sup>   | 1.54  |
| <b>tZRPs</b>                                                                  | 0.18 <sup>ab</sup> | 0.02 | 0.23 <sup>a</sup>   | 0.09  | 0.18 <sup>ab</sup>  | 0.07  | 0.09 <sup>b</sup>  | 0.03 | 0.17 <sup>ab</sup>  | 0.08 | 0.24 <sup>a</sup>   | 0.10  |
| <b>tZ7G</b>                                                                   | 0.08               | 0.03 | n.d.                | n.d.  | n.d.                | n.d.  | n.d.               | n.d. | n.d.                | n.d. | n.d.                | n.d.  |
| <b>tZ9G</b>                                                                   | n.d.               | n.d. | n.d.                | n.d.  | n.d.                | n.d.  | n.d.               | n.d. | n.d.                | n.d. | n.d.                | n.d.  |
| <b>tZOG</b>                                                                   | n.d.               | n.d. | n.d.                | n.d.  | n.d.                | n.d.  | n.d.               | n.d. | n.d.                | n.d. | n.d.                | n.d.  |
| <b>tZROG</b>                                                                  | n.d.               | n.d. | n.d.                | n.d.  | n.d.                | n.d.  | n.d.               | n.d. | n.d.                | n.d. | n.d.                | n.d.  |
| <b>tZRPsOG</b>                                                                | n.d.               | n.d. | n.d.                | n.d.  | n.d.                | n.d.  | n.d.               | n.d. | n.d.                | n.d. | n.d.                | n.d.  |
| <b>cZ</b>                                                                     | 1.52 <sup>a</sup>  | 0.11 | 1.15 <sup>ab</sup>  | 0.61  | 0.92 <sup>ab</sup>  | 0.27  | 0.71 <sup>b</sup>  | 0.27 | 1.22 <sup>ab</sup>  | 0.26 | 1.35 <sup>ab</sup>  | 0.52  |
| <b>cZR</b>                                                                    | 22.28 <sup>a</sup> | 3.29 | 24.57 <sup>a</sup>  | 11.06 | 25.03 <sup>a</sup>  | 10.91 | 10.98 <sup>a</sup> | 1.94 | 23.84 <sup>a</sup>  | 6.42 | 26.08 <sup>a</sup>  | 14.59 |
| <b>cZRPs</b>                                                                  | 19.77 <sup>a</sup> | 4.87 | 13.16 <sup>ab</sup> | 6.68  | 11.24 <sup>ab</sup> | 4.27  | 6.01 <sup>b</sup>  | 1.58 | 10.86 <sup>ab</sup> | 2.67 | 14.95 <sup>ab</sup> | 9.12  |
| <b>cZOG</b>                                                                   | 3.27 <sup>ab</sup> | 0.50 | 7.83 <sup>a</sup>   | 3.08  | 1.81 <sup>b</sup>   | 1.30  | 2.91 <sup>b</sup>  | 1.85 | 3.41 <sup>ab</sup>  | 1.33 | 3.76 <sup>ab</sup>  | 2.74  |
| <b>cZROG</b>                                                                  | 1.04 <sup>a</sup>  | 0.17 | 1.15 <sup>a</sup>   | 0.47  | 0.53 <sup>a</sup>   | 0.26  | 0.59 <sup>a</sup>  | 0.10 | 0.93 <sup>a</sup>   | 0.18 | 0.99 <sup>a</sup>   | 0.49  |
| <b>cZRPsOG</b>                                                                | n.d.               | n.d. | n.d.                | n.d.  | n.d.                | n.d.  | n.d.               | n.d. | n.d.                | n.d. | n.d.                | n.d.  |
| <b>iP</b>                                                                     | 1.17 <sup>a</sup>  | 0.10 | 1.37 <sup>ab</sup>  | 1.13  | 0.76 <sup>ab</sup>  | 0.26  | 0.44 <sup>b</sup>  | 0.11 | 1.11 <sup>ab</sup>  | 0.20 | 1.00 <sup>ab</sup>  | 0.44  |
| <b>iPR</b>                                                                    | 4.58 <sup>ab</sup> | 0.66 | 6.62 <sup>a</sup>   | 2.51  | 5.66 <sup>a</sup>   | 2.28  | 1.88 <sup>b</sup>  | 0.49 | 6.10 <sup>a</sup>   | 2.08 | 6.25 <sup>a</sup>   | 3.42  |
| <b>iPRPs</b>                                                                  | 1.67 <sup>a</sup>  | 0.15 | 1.49 <sup>ab</sup>  | 0.74  | 1.02 <sup>ab</sup>  | 0.49  | 0.63 <sup>b</sup>  | 0.22 | 1.24 <sup>ab</sup>  | 0.21 | 1.64 <sup>ab</sup>  | 0.88  |
| <b>iP7G</b>                                                                   | n.d.               | n.d. | n.d.                | n.d.  | n.d.                | n.d.  | n.d.               | n.d. | n.d.                | n.d. | n.d.                | n.d.  |
| <b>iP9G</b>                                                                   | n.d.               | n.d. | n.d.                | n.d.  | n.d.                | n.d.  | n.d.               | n.d. | n.d.                | n.d. | n.d.                | n.d.  |
| <b>DZ</b>                                                                     | 0.18 <sup>a</sup>  | 0.04 | n.d.                | n.d.  | 0.09 <sup>a</sup>   | 0.03  | 0.11 <sup>a</sup>  | 0.12 | 0.08 <sup>a</sup>   | 0.02 | 0.18 <sup>a</sup>   | 0.07  |

|               |                     |       |                     |       |                     |        |                    |       |                     |       |                     |       |
|---------------|---------------------|-------|---------------------|-------|---------------------|--------|--------------------|-------|---------------------|-------|---------------------|-------|
| <b>DZR</b>    | n.d.                | n.d.  | n.d.                | n.d.  | n.d.                | n.d.   | n.d.               | n.d.  | n.d.                | n.d.  | n.d.                | n.d.  |
| <b>DZRPs</b>  | 0.24 <sup>a</sup>   | 0.05  | 0.18 <sup>ab</sup>  | 0.09  | 0.14 <sup>ab</sup>  | 0.04   | 0.10 <sup>b</sup>  | 0.03  | 0.15 <sup>ab</sup>  | 0.03  | 0.21 <sup>ab</sup>  | 0.11  |
| <b>DZ9G</b>   | n.d.                | n.d.  | n.d.                | n.d.  | n.d.                | n.d.   | n.d.               | n.d.  | n.d.                | n.d.  | n.d.                | n.d.  |
| <b>IAA</b>    | 335.1 <sup>a</sup>  | 39.94 | 443.1 <sup>a</sup>  | 266.9 | 266.1 <sup>a</sup>  | 128.78 | 189.2 <sup>a</sup> | 36.3  | 229.7 <sup>a</sup>  | 56.2  | 288.4 <sup>a</sup>  | 161.0 |
| <b>IAA1a</b>  | n.d.                | n.d.  | n.d.                | n.d.  | n.d.                | n.d.   | n.d.               | n.d.  | n.d.                | n.d.  | n.d.                | n.d.  |
| <b>IA1le</b>  | n.d.                | n.d.  | n.d.                | n.d.  | n.d.                | n.d.   | n.d.               | n.d.  | n.d.                | n.d.  | n.d.                | n.d.  |
| <b>IA1eu</b>  | n.d.                | n.d.  | n.d.                | n.d.  | n.d.                | n.d.   | n.d.               | n.d.  | n.d.                | n.d.  | n.d.                | n.d.  |
| <b>IA1sp</b>  | n.d.                | n.d.  | n.d.                | n.d.  | n.d.                | n.d.   | n.d.               | n.d.  | n.d.                | n.d.  | n.d.                | n.d.  |
| <b>IA1Trp</b> | n.d.                | n.d.  | n.d.                | n.d.  | n.d.                | n.d.   | n.d.               | n.d.  | n.d.                | n.d.  | n.d.                | n.d.  |
| <b>IA1Phe</b> | n.d.                | n.d.  | n.d.                | n.d.  | n.d.                | n.d.   | n.d.               | n.d.  | n.d.                | n.d.  | n.d.                | n.d.  |
| <b>GA1</b>    | n.d.                | n.d.  | n.d.                | n.d.  | n.d.                | n.d.   | n.d.               | n.d.  | n.d.                | n.d.  | n.d.                | n.d.  |
| <b>GA3</b>    | n.d.                | n.d.  | n.d.                | n.d.  | n.d.                | n.d.   | n.d.               | n.d.  | n.d.                | n.d.  | n.d.                | n.d.  |
| <b>GA4</b>    | n.d.                | n.d.  | n.d.                | n.d.  | n.d.                | n.d.   | n.d.               | n.d.  | n.d.                | n.d.  | n.d.                | n.d.  |
| <b>GA7</b>    | n.d.                | n.d.  | n.d.                | n.d.  | n.d.                | n.d.   | n.d.               | n.d.  | n.d.                | n.d.  | n.d.                | n.d.  |
| <b>GA8</b>    | 12.27 <sup>ab</sup> | 1.17  | 11.54 <sup>a</sup>  | 2.79  | 11.77 <sup>ab</sup> | 4.36   | 3.54 <sup>b</sup>  | 1.93  | 7.50 <sup>ab</sup>  | 3.46  | 7.85 <sup>ab</sup>  | 4.46  |
| <b>GA9</b>    | 4.47 <sup>a</sup>   | 1.96  | 4.78 <sup>a</sup>   | 4.52  | 1.97 <sup>a</sup>   | 1.82   | 0.93 <sup>a</sup>  | 0.75  | 3.89 <sup>a</sup>   | 1.51  | 3.60 <sup>a</sup>   | 2.11  |
| <b>GA12</b>   | 243.8 <sup>a</sup>  | 50.97 | 340.4 <sup>a</sup>  | 193.3 | 301.2 <sup>a</sup>  | 142.5  | 143.2 <sup>a</sup> | 58.23 | 362.0 <sup>a</sup>  | 187.5 | 279.2 <sup>a</sup>  | 148.6 |
| <b>GA19</b>   | 20.28 <sup>a</sup>  | 3.12  | 14.39 <sup>ab</sup> | 7.03  | 14.05 <sup>ab</sup> | 6.16   | 7.19 <sup>b</sup>  | 1.50  | 10.37 <sup>b</sup>  | 3.06  | 11.30 <sup>ab</sup> | 6.00  |
| <b>GA20</b>   | n.d.                | n.d.  | n.d.                | n.d.  | n.d.                | n.d.   | n.d.               | n.d.  | n.d.                | n.d.  | n.d.                | n.d.  |
| <b>GA24</b>   | 5.34 <sup>a</sup>   | 0.81  | 5.57 <sup>a</sup>   | 2.00  | 4.18 <sup>ab</sup>  | 2.38   | 1.86 <sup>b</sup>  | 0.33  | 2.58 <sup>ab</sup>  | 0.49  | 2.87 <sup>ab</sup>  | 0.88  |
| <b>GA44</b>   | n.d.                | n.d.  | n.d.                | n.d.  | n.d.                | n.d.   | n.d.               | n.d.  | n.d.                | n.d.  | n.d.                | n.d.  |
| <b>GA53</b>   | 76.30 <sup>a</sup>  | 9.17  | 66.92 <sup>ab</sup> | 27.10 | 77.71 <sup>ab</sup> | 33.82  | 21.59 <sup>b</sup> | 4.83  | 62.56 <sup>ab</sup> | 22.39 | 39.72 <sup>ab</sup> | 19.80 |
| <b>ABA</b>    | 2567 <sup>a</sup>   | 123.3 | 1690 <sup>ab</sup>  | 874.0 | 1858 <sup>ab</sup>  | 940.5  | 624.7 <sup>b</sup> | 201.1 | 2035 <sup>ab</sup>  | 746.6 | 1452 <sup>ab</sup>  | 858.0 |

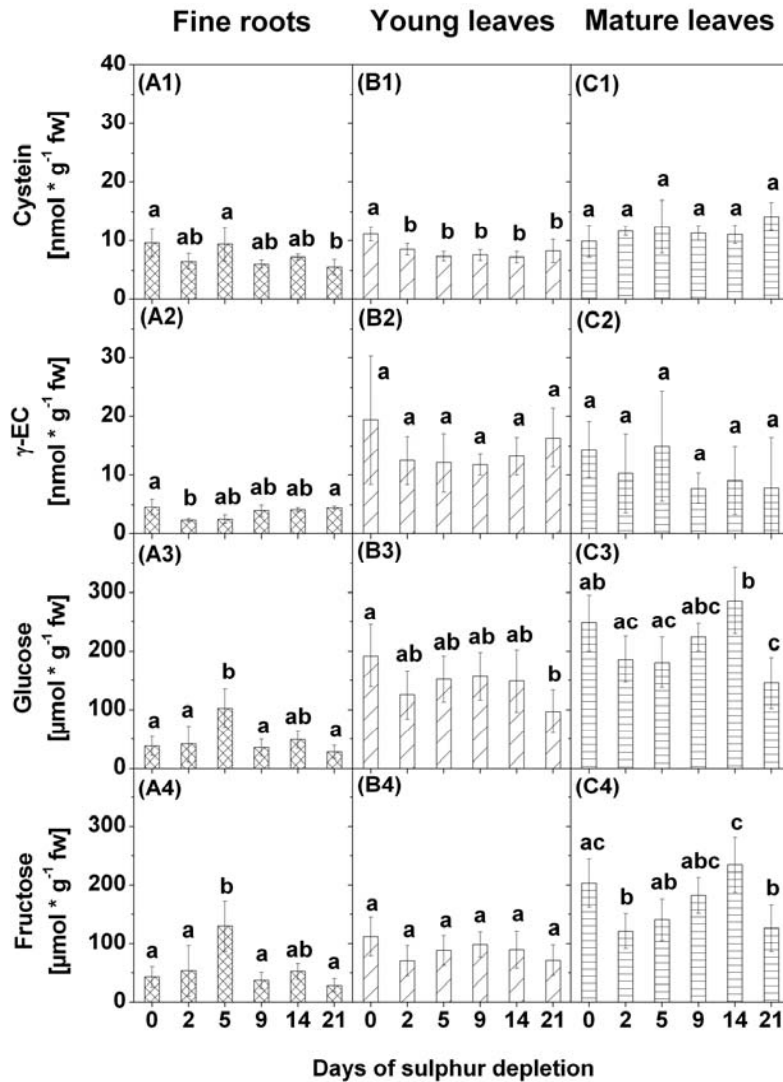

**Supplementary Figure S1** Cysteine (1),  $\gamma$ -glutamyl-cysteine ( $\gamma$ -EC, 2), glucose (3) and fructose (4) contents in fine roots (A), young leaves (B) and mature leaves (C) of poplar treated with sulphur depletion and of control plants (day 0). Data presented are means including standard deviation of five replicates where each replicate consisted of two pooled plants. Small letters indicate significant differences at  $p < 0.05$  between different time-points within one tissue. fw: fresh weight

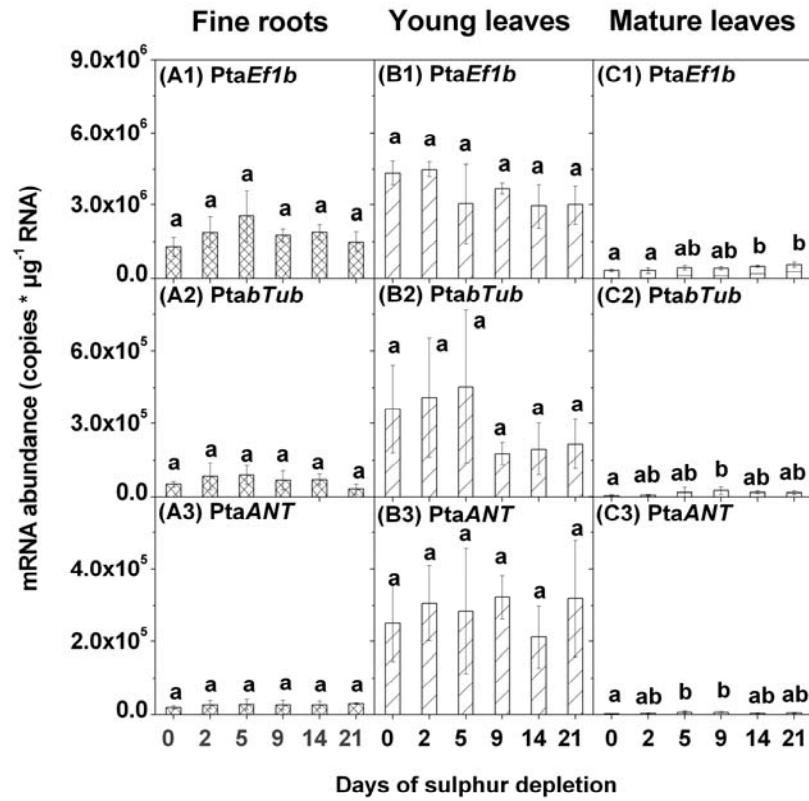

**Supplementary Figure S2** Changes in gene expression of three reference genes, i.e. *elongation factor 1 $\beta$*  (*Ef1b*, 1),  *$\beta$ -tubulin* (*bTub*, 2) and *Aintegumenta* (*ANT*, 3), in fine roots (A), young leaves (B) and mature leaves (right) due to sulphur depletion treatment. Controls are represented by day 0. mRNA abundance was related to total RNA. Data presented are means including standard deviation of five replicates where each replicate consisted of two pooled plants. Small letters indicate significant differences at  $p < 0.05$  between different time-points within one tissue.

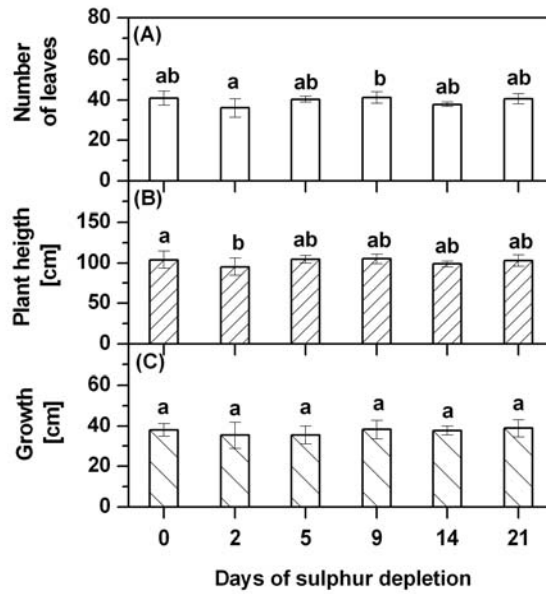

**Supplementary Figure S3** Leaf number, plant height and plant growth of poplar treated with sulphur depletion and of control plants (day 0). Leaf number and plant height were determined directly before harvest. The growth was calculated by the difference between initial (start of the experiment) and final (end of the experiment) plant height. Data presented are means including standard deviations of ten individual plants. Small letters indicate significant differences at  $p < 0.05$ .

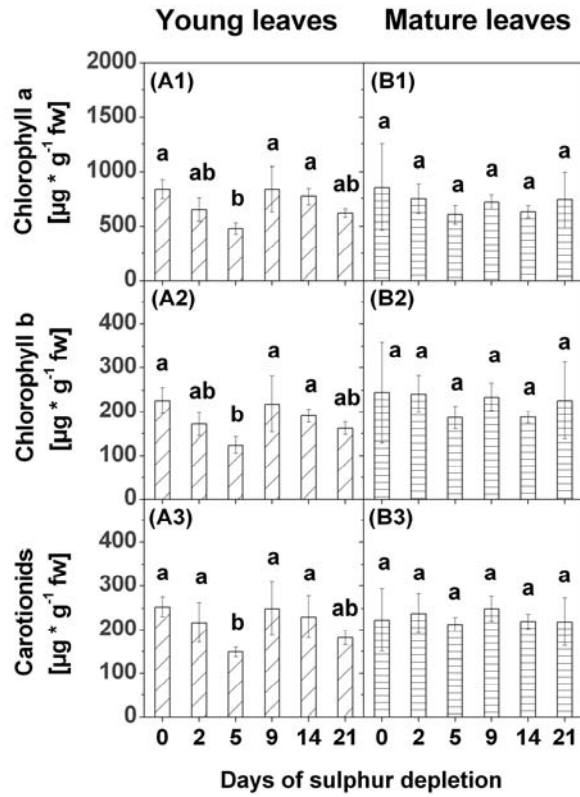

**Supplementary Figure S3** Contents of chlorophyll a (1), chlorophyll b (2) and carotinoids (3) in young (A) and mature leaves (B) of poplar treated with sulphur depletion and of control plants (day 0). Data presented are means including standard deviation of five replicates where each replicate consisted of two pooled plants. Small letters indicate significant differences at  $p < 0.05$  between different time-points within one tissue. fw: fresh weight
